# Supplementary material
Source: publisher figshare collection journal article supplement (https://tandf.figshare.com/ndownloader/files/22805129)

## **SUPPLEMENTARY MATERIAL**

### **Content**

|   |                                                                                                  |   |
|---|--------------------------------------------------------------------------------------------------|---|
| 1 | RESULTS   SUPPLEMENTARY FIGURES .....                                                            | 2 |
|   | Supplementary Figure 1. Level of agreement of the specialists with the following statements..... | 2 |

## 1 RESULTS | SUPPLEMENTARY FIGURES

**Supplementary Figure 1. Level of agreement of the specialists with the following statements**

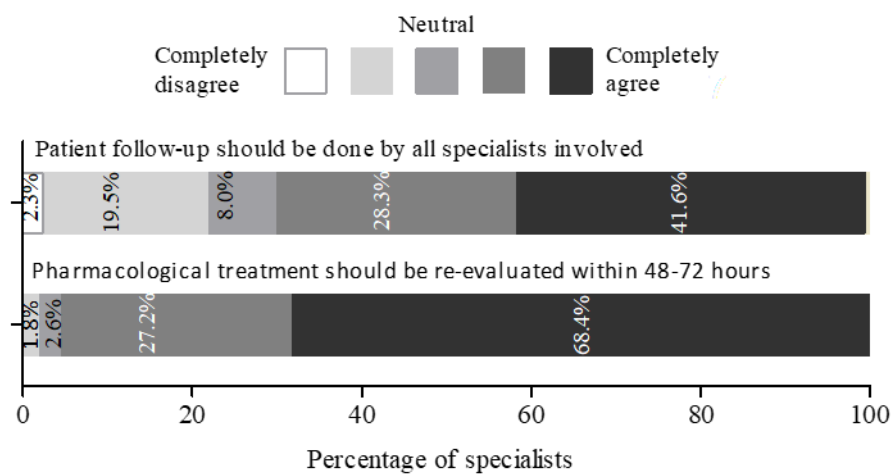

Supplement: Supplementary file 1 [file 22805129]
